# Supplementary material
Source: Royal Society of Chemistry journal article supplement (doi:10.1039/d6ce00125d)
Supplement: d6ce00125d1.pdf [file d6ce00125d1.pdf]

# Supporting Information

## Halogen-Modulated Zinc-Based 0D Hybrids for High-Efficiency Blue Light Emission

Cheng-Fang Zhang,<sup>a†</sup> Wen-He Zhong,<sup>a†</sup> Peng-Cheng Ma,<sup>a</sup> Jia-Jia Zhao,<sup>\*a</sup> Ting Cheng,  
<sup>\*a,b</sup> and Li-Zhuang Chen,<sup>\*a</sup>

<sup>a</sup>School of Environmental and Chemical Engineering, Jiangsu University of Science  
and Technology, Zhenjiang 212003 (China)

<sup>b</sup>School of Environmental Ecology, The City Vocational College of Jiangsu, Nanjing  
210017, (China)

\*Corresponding author

Email address: clz1977@sina.com (L.-Z. Chen); zhaojjia@just.edu.cn (J.-J. Zhao)

†These authors contributed equally to this manuscript.

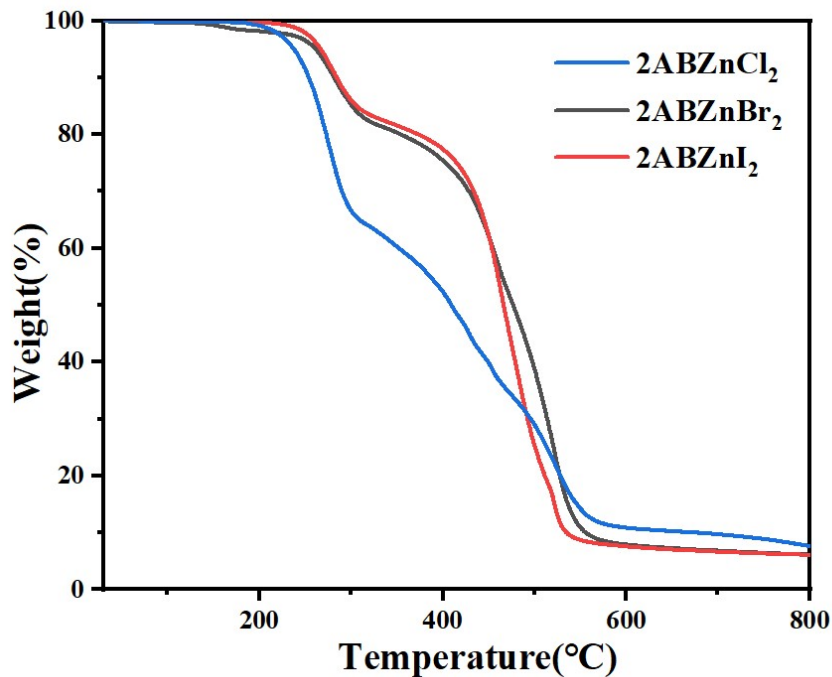

**Figure S1** The TG curves for  $2ABZnCl_2$ ,  $2ABZnBr_2$  and  $2ABZnI_2$ , indicating the decent thermal stability of the three compounds.

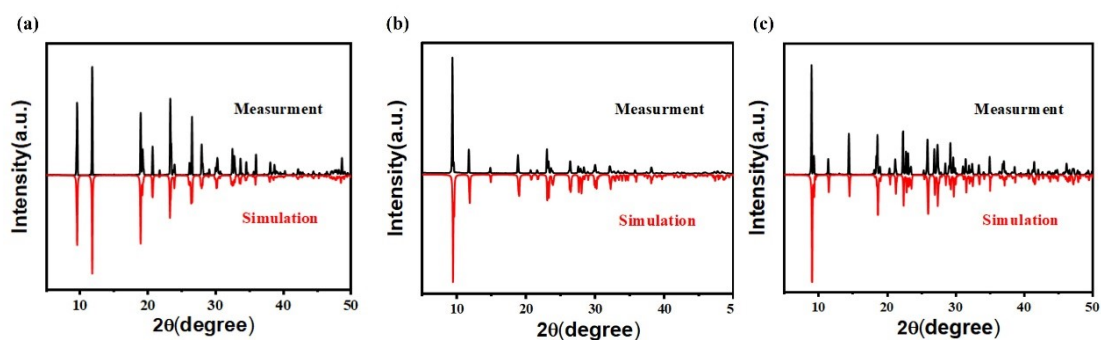

**Figure S2** Experimental powder X-ray diffraction patterns of  $2ABZnCl_2$ ,  $2ABZnBr_2$ ,  $2ABZnI_2$  match very well with the simulated ones based on the crystal structures at 296 K

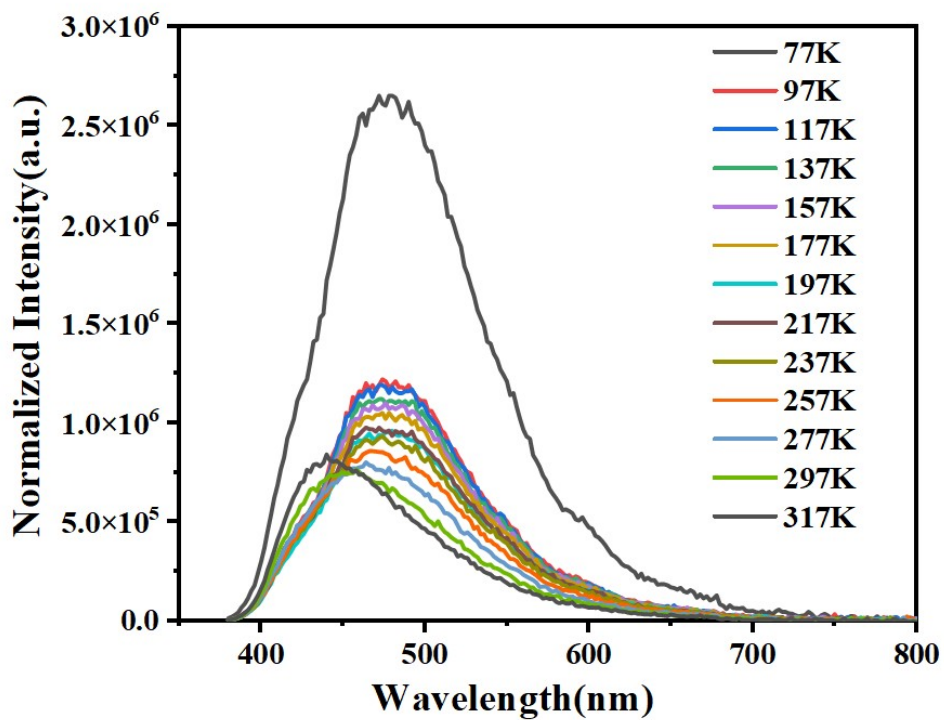

Figure S3 Temperature-dependent PL spectra of 2ABZnI<sub>2</sub> measured from 77 K to 317 K.

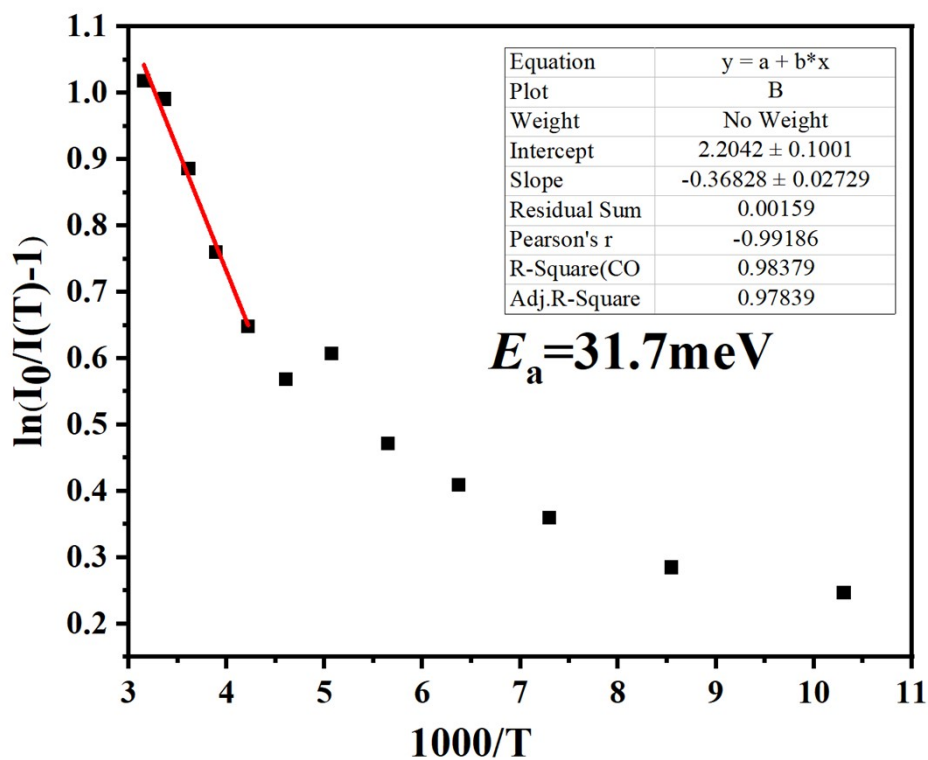

Figure S4 Arrhenius plot of the integrated PL intensity for 2ABZnI<sub>2</sub>.

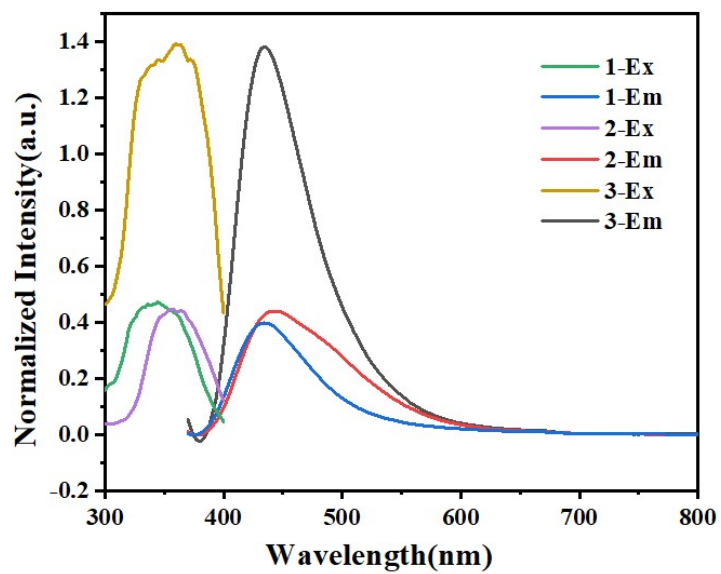

Figure S5 Excitation-emission spectra of 2ABZnCl<sub>2</sub>, 2ABZnBr<sub>2</sub>, and 2ABZnI<sub>2</sub>

**Table S1** Crystal data and structure refinements for crystals **1-3**.

| Formula                   | <b>2ABZnCl<sub>2</sub></b> | <b>2ABZnBr<sub>2</sub></b> | <b>2ABZnI<sub>2</sub></b> |
|---------------------------|----------------------------|----------------------------|---------------------------|
| Formula weight            | 408                        | 497.18                     | 319.18                    |
| Temperature / K           | 296.15                     | 296.15                     | 296.15                    |
| Crystal system            | triclinic                  | monoclinic                 | monoclinic                |
| Space group               | <i>P2<sub>1</sub>/c</i>    | <i>C2/c</i>                | <i>C2/c</i>               |
| a/Å                       | 19.022(7)                  | 23.863(13)                 | 23.3146(4)                |
| b/Å                       | 4.845(7)                   | 4.8456(2)                  | 4.8922(1)                 |
| c/Å                       | 19.210(2)                  | 18.19697(2)                | 19.1901(4)                |
| α/deg                     | 90                         | 103.52                     | 90                        |
| β/deg                     | 90                         | 127.809                    | 90                        |
| γ/deg                     | 90                         | 127.040                    | 90                        |
| Volume/Å <sup>3</sup>     | 1721.4(12)                 | 1735.5                     | 1822.08(7)                |
| Z                         | 4                          | 4                          | 4                         |
| Density g/cm <sup>3</sup> | 1.577                      | 1.873                      | 2.163                     |
| R1[I≥2σ(I)]               | 0.0378                     | 0.0292                     | 0.0256                    |
| wR2[I≥2σ(I)]              | 0.1098                     | 0.1027                     | 0.0585                    |
| GOF                       | 1.020                      | 1.197                      | 1.028                     |
